# Supplementary material
Source: PubMed Central journal article supplement (PMC4017314)
Supplement: supp_blood-2012-04-425215_blood-2012-04-425215-1.pdf [file supp_blood-2012-04-425215_blood-2012-04-425215-1.pdf]

## Supplementary Data

### Supplementary Table 1: Quantitation of Platelet Dense Granule Components.

| Component         | In granule (mM)   | Initial local concentration upon granule release ( $\mu\text{M}$ ) | In vessel before granule release ( $\mu\text{M}$ ) |
|-------------------|-------------------|--------------------------------------------------------------------|----------------------------------------------------|
| ADP               | 653 <sup>1</sup>  | $\approx 1000$ <sup>2</sup>                                        | 0.13 <sup>3</sup>                                  |
| ATP               | 436 <sup>1</sup>  | $\approx 1000$ <sup>2</sup>                                        | 2 <sup>3</sup>                                     |
| Ca <sup>2+</sup>  | 2181 <sup>1</sup> |                                                                    | 2500 <sup>1</sup>                                  |
| Ap <sub>3</sub> A | 166 <sup>4</sup>  | $\geq 100$ <sup>5</sup>                                            | 0.89 <sup>6</sup>                                  |
| Ap <sub>4</sub> A | 205 <sup>4</sup>  | $\geq 100$ <sup>5</sup>                                            | 0.72 <sup>6</sup>                                  |
| Ap <sub>5</sub> A | 82.0 <sup>4</sup> |                                                                    | 0.33 <sup>6</sup>                                  |
| Ap <sub>6</sub> A | 26.7 <sup>4</sup> |                                                                    | 0.18 <sup>6</sup>                                  |
| Serotonin         | 65 <sup>1</sup>   |                                                                    |                                                    |
| Pyrophosphate     | 326 <sup>7</sup>  |                                                                    |                                                    |

The concentrations of each component were derived based on the assumptions that dense granules have volumes of  $6.69 \times 10^{-3} \mu\text{m}^3$  and that there are 7 granules per platelet<sup>1</sup>.

## References

1. Holmsen H, Weiss HJ. Secretable storage pools in platelets. *Annual review of medicine* 1979; **30**: 119-34.
2. Beigi R, Kobatake E, Aizawa M, Dubyak GR. Detection of local ATP release from activated platelets using cell surface-attached firefly luciferase. *The American journal of physiology* 1999; **276**(1 Pt 1): C267-78.
3. Jabs CM, Ferrell WJ, Robb HJ. Plasma ADP levels: direct determination with luciferase luminescence using a biometer. *Clinical biochemistry* 1978; **11**(5): 190-3.
4. Jankowski J, Potthoff W, van der Giet M, Tepel M, Zidek W, Schluter H. High-performance liquid chromatographic assay of the diadenosine polyphosphates in human platelets. *Anal Biochem* 1999; **269**(1): 72-8.
5. Olgilvie A. *AP4A AND OTHER DINUCLEOTIDE POLYPHOSPHATES*, CRC Press: Boca Raton, 1992.

6. Jankowski J, Jankowski V, Laufer U, van der Giet M, Henning L, Tepel M *et al.* Identification and quantification of diadenosine polyphosphate concentrations in human plasma. *Arteriosclerosis, thrombosis, and vascular biology* 2003; **23**(7): 1231-8.
7. Ruiz FA, Lea CR, Oldfield E, Docampo R. Human platelet dense granules contain polyphosphate and are similar to acidocalcisomes of bacteria and unicellular eukaryotes. *J Biol Chem* 2004; **279**(43): 44250-7.
